# Supplementary material
Source: PubMed Central journal article supplement (PMC5805133)
Supplement: NIHMS856457-supplement-2.pdf [file NIHMS856457-supplement-2.pdf]

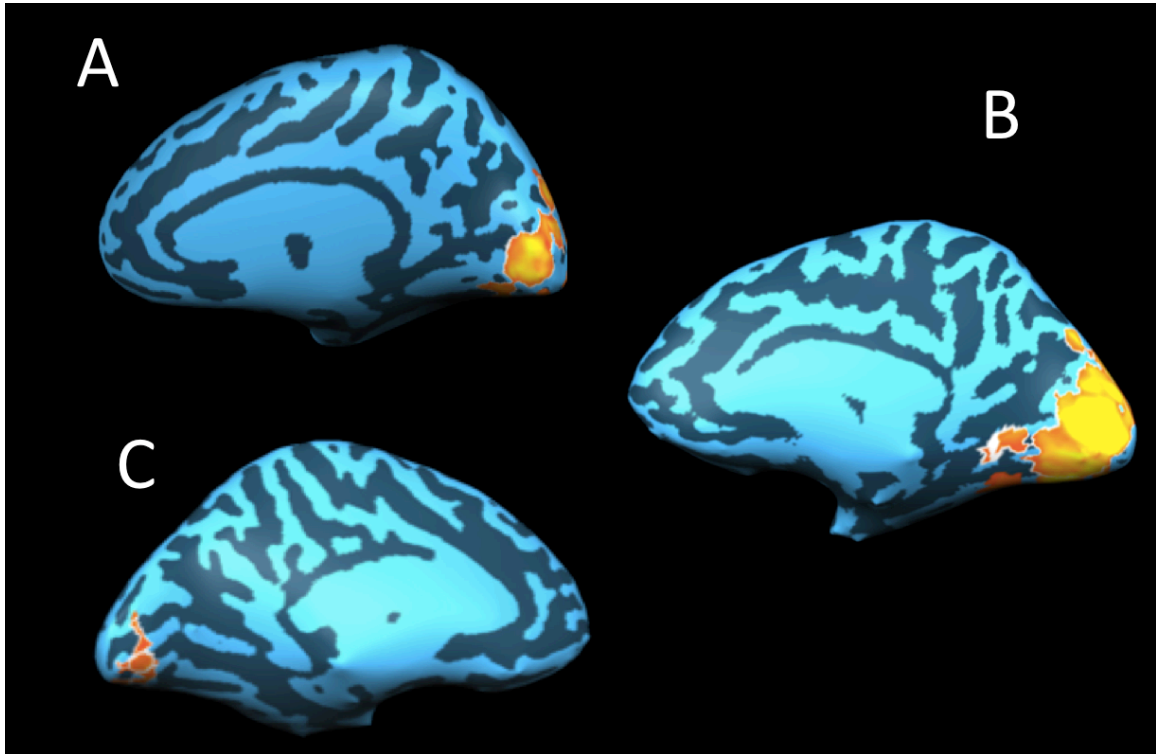

**Figure S2. Quantification of the fMRI activations for the medial aspect of visual cortex.** An example of manual extraction of the medial visual cortex clusters of activations for four LCA2 patients. Each case presented in sections A, B, and C demonstrate different patterns of activation distribution within the medial surface of the visual cortex for four LCA2 patients.
