# Supplementary material
Source: PubMed Central journal article supplement (PMC5805133)
Supplement: NIHMS856457-supplement-3.pdf [file NIHMS856457-supplement-3.pdf]

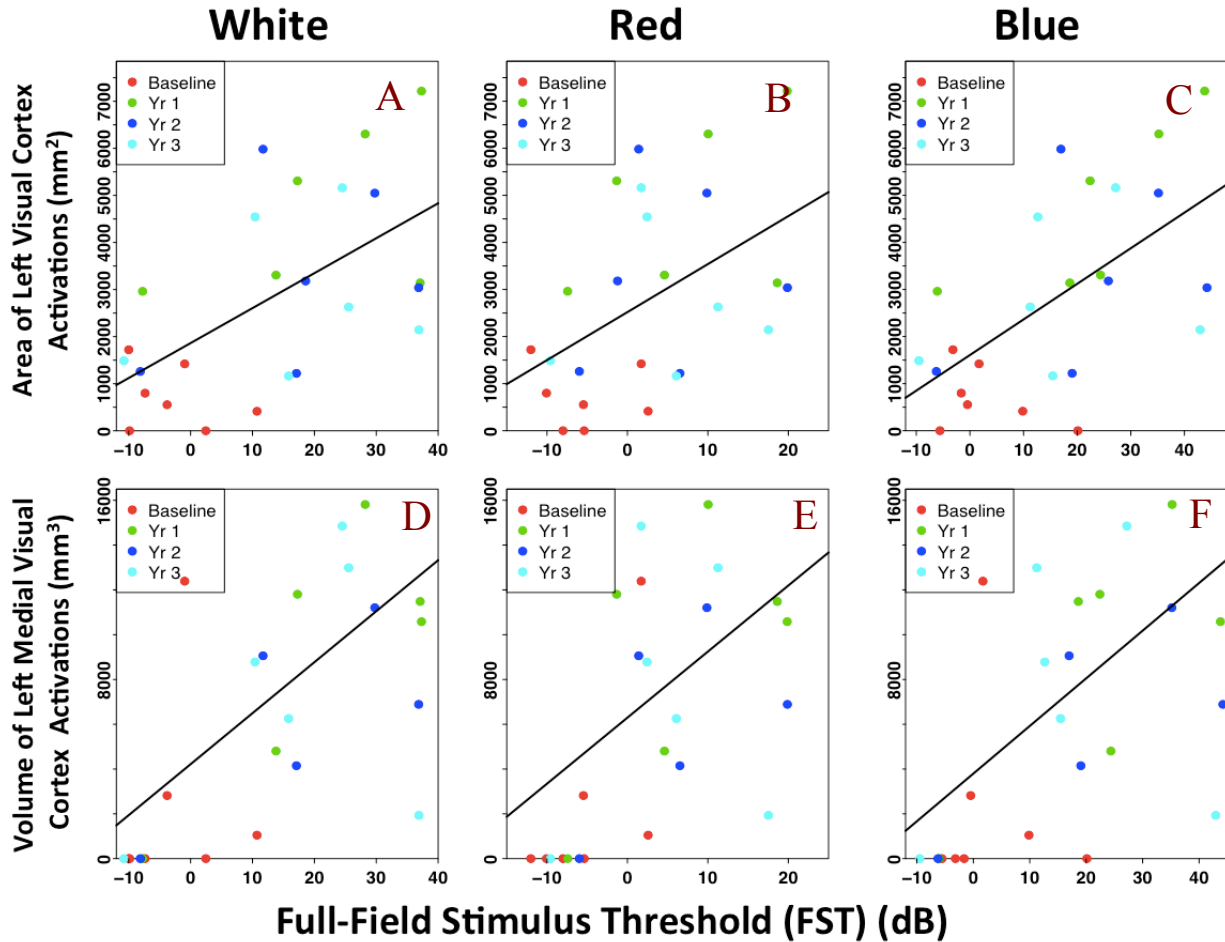

**Figure S3. Association of the area of left overall visual cortex and the volume of medial visual cortex activations with FST clinical measures.** Scatter plot with linear regression lines from the mixed effect model for the association of cortical activations with FST measures. The top portion presents the association of the FST measures for the (A) white, (B) red, and (C) blue stimuli with the area of the **left** visual cortex activations. The bottom portion shows the association for the (D) white, (E) red, and (F) blue with the volume of the total medial visual cortex activations. Both measures of the cortical activations are significantly associated with the light sensitivity in LCA patients over time. However, FST measures are more strongly associated with the magnitude changes of the **left medial** cortex activations (see Discussion).
