# Supplementary material
Source: PubMed Central journal article supplement (PMC5805133)
Supplement: NIHMS856457-supplement-4.pdf [file NIHMS856457-supplement-4.pdf]

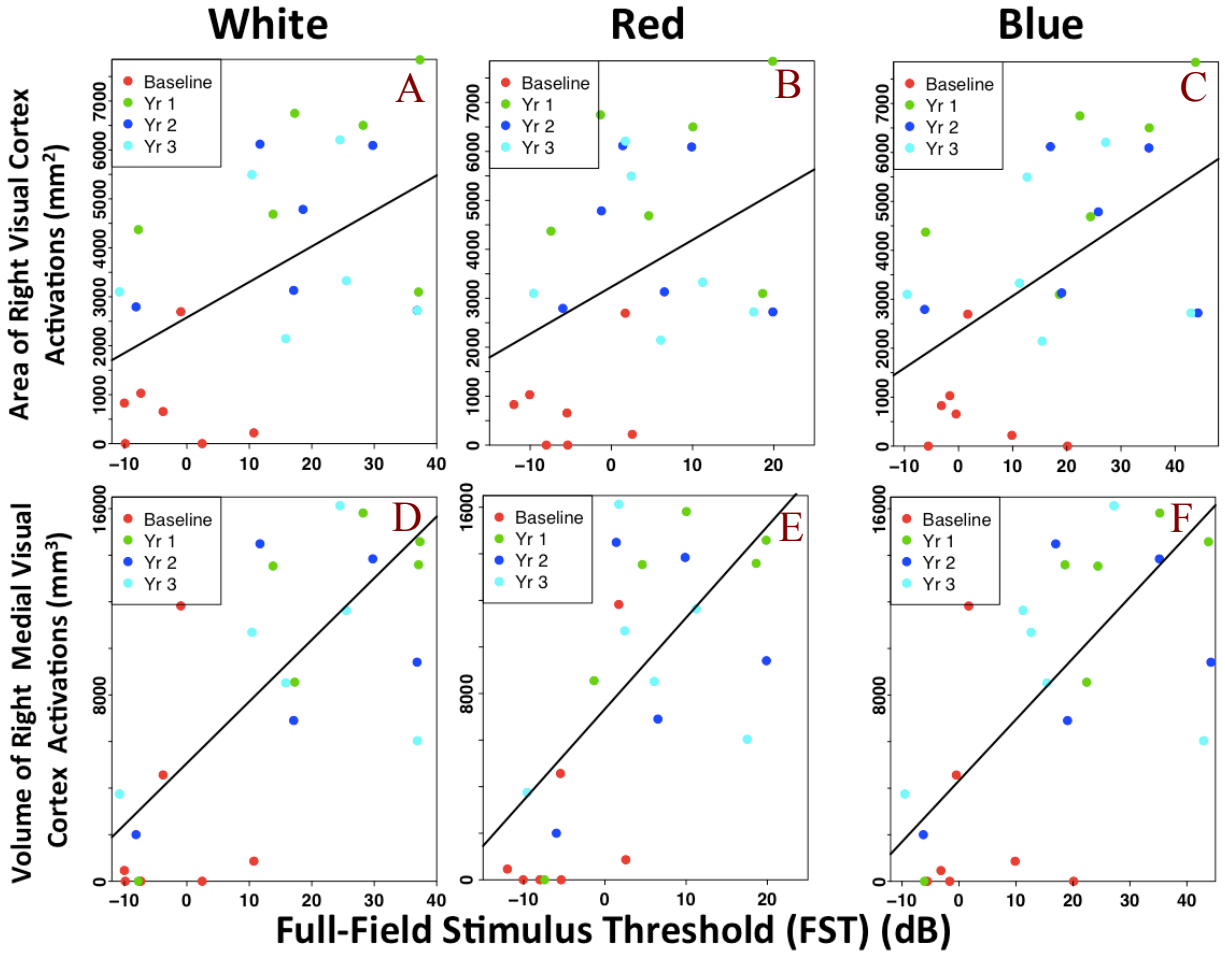

**Figure S4. Association of the area of right overall visual cortex and the volume of medial visual cortex activations with FST clinical measures.** Scatter plot with linear regression lines from the mixed effect model for the association of cortical activations with FST measures. The top portion shows the association of the FST measures with (A) white, (B) red, and (C) blue stimuli and the area of the **right** visual cortex activations. The bottom portion shows the association between (D) white, (E) red, and (F) blue with the volume of the total medial visual cortex activations. Both measures of the cortical activations are significantly associated with the light sensitivity in LCA patients over time. However, FST measures are more strongly associated with the **right medial** cortex activations (see Discussion).
