# Supplementary material
Source: PubMed Central journal article supplement (PMC5805133)
Supplement: NIHMS856457-supplement-6.pdf [file NIHMS856457-supplement-6.pdf]

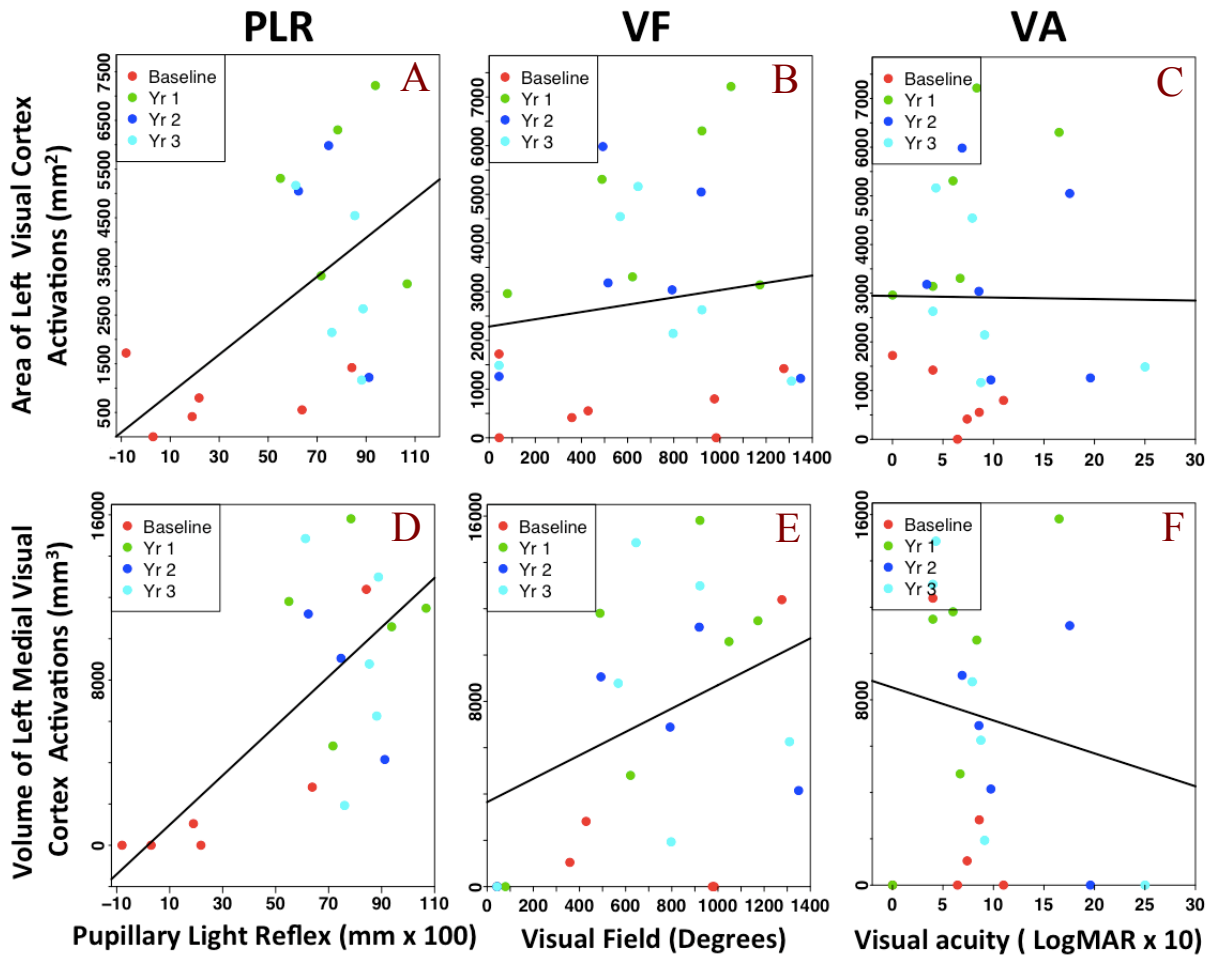

**Figure S6. Association of the area of left overall visual cortex and the volume of medial visual cortex activations with PLR, VF and VA clinical measures.** Scatter plot with linear regression lines from the mixed effect model for the association of cortical activations with and PLR, VF and VA measures. The top portion shows the association of the PLR (A), VF (B), and VA (C) measures and the area of the **left** visual cortex activations. The bottom portion shows the association between PLR (D), VF (E), and VA (F) measures and the volume of the **left medial** visual cortex activations. Both measures of the cortical activations are strongly associated with the PLR of the LCA patients over time. However, the medial activations are more strongly associated with the VF. No association was observed between the VA and the area of the **left** visual cortex and the volume of the **left medial** activations.
